# Supplementary material for: In silico Analysis of Gamma-Secretase-Complex Mutations in Hidradenitis Suppurativa Demonstrates Disease-Specific Substrate Recognition and Cleavage Alterations
Source: Front Med (Lausanne). 2019 Sep 19;6:206. doi: 10.3389/fmed.2019.00206 (PMC6761225; doi:10.3389/fmed.2019.00206)
Supplement: Supplementary File 2 — ADAM10 and ADAM17 expression between HS, AzD, Psoriasis, Atopic Dermatitis, Alopecia Areata, Parkinson's disease, and Huntington's disease. [file Table_2.XLSX]

## Sheet: Sheet1
HS Skin			Pso Skin			HS Blood			Alz Blood					Functional Annotation	HS Skin	Pso Skin	Functional Annotation	HS Blood	Alz Blood
		APAF1,ATM,ATR,BCL2,BCL2L11,BLM,CASP3,CASP4,CASP8,CASP9,CASR,CD40,CDKN2A,CFLAR,COMP,DSG3,FAS,FASLG,GLS,GNA13,GRB10,GSN,HSPD1,IFNAR1,IFNAR2,IFNG,IL10,IL15,ITGA6,MAPK14,MCL1,MYC,NFKB1,NGF,PPM1D,PTAFR,RHOG,SFRP1,TNF,TNFRSF10A,TNFRSF10B,TNFRSF1A,TNFSF10,XIAP	Advanced malignant tumor	-2.266	APP,AXL,BTC,CD44,CDH1,CX3CL1,DCC,DLL1,DSG2,FGFR3,FGFR4,GHR,IL6R,JAG2,LRP6,MET,MUC1,NRG1,NRG2,SDC1,SDC2,TYRO3	Activation of cells	2.181	APP,AXL,CD44,CDH1,CSF1R,CX3CL1,DLL1,EFNB2,FGFR3,IL6R,LRP6,MET,NRG1,SDC2,TGFBR3,TYRO3	Cellular infiltration by leukocytes	-2.196	APP,CD44,CSF1R,CX3CL1,CXCL16,IL6R,KCNE3,MET			Apoptosis	2.353	1.974	Activation of cells	2.181	1.768
Apoptosis	2.353	CFLAR,FAS,IFNG,IL10,SFRP1,TNF	Apoptosis	1.974	APLP1,APLP2,APP,BTC,CSF1R,FGFR3,FGFR4,GHR,NECTIN1,NRG2,VLDLR	Adhesion of breast cancer cell lines	1.083	CD44,CDH1,MET,NRG1	Adhesion of breast cancer cell lines	1.083	CD44,CDH1,MET,NRG1			Cell survival	1.816	-1.404	Adhesion of breast cancer cell lines	1.083	1.083
Apoptosis of dermal fibroblasts	1.633	ATM,ATR,BCL2,BCL2L11,BLM,CASP4,CASP8,CASP9,CD40,CFLAR,COMP,FAS,FASLG,GLS,GNA13,GRB10,GSN,HSPD1,IFNAR1,IFNAR2,ITGA6,MYC,NFKB1,NGF,RHOG,TNF,TNFRSF1A,TNFSF10	Binding of gonadal cell lines	-1.951	APLP2,APP,AXL,CD44,CDH1,CSF1R,CXCL16,DCC,DNER,DSG2,EFNB2,FGFR3,FGFR4,GHR,IL6R,JAG2,KCNE4,LRP2,LRP6,MET,MUC1,NRG1,NRG2,PKHD1,PTK7,ROBO1,RYK,SDC1,SDC2,TIE1,TYRO3	Advanced malignant tumor	0.204	AXL,CD44,CDH1,CSF1R,DCC,DSG2,FGFR3,FGFR4,JAG2,LRP2,MET,MUC1,ROBO1,SDC1,TGFBR3,TYRO3	Differentiation of nervous system	1.524	APP,DAG1,DLL1,DNER,FGFR3,IL6R,LRP6,MET,NRG1,RYK			Endocytosis	1.067	-1.28	Advanced malignant tumor	0.204	1.826
Apoptosis of fibroblast cell lines	2.365	CDKN2A,CFLAR,FAS,FASLG,IFNG,IL10,MAPK14,SFRP1,TNF	Cancer of cells	-1.89	AXL,BTC,CD44,CDH1,CSF1R,CXCL16,DCC,EFNB2,FGFR3,FGFR4,IL6R,MET,MUC1,NRG1,SDC1,SDC2	Attachment of cells	1.981	BTC,CD44,DAG1,DSG2,NRG1,SDC3	Growth of tumor	1.537	AXL,BTC,CD44,CDH1,CSF1R,CXCL16,DCC,EFNB2,FGFR3,FGFR4,IL6R,MET,MUC1,NRG1,SDC1,SDC2			Microtubule dynamics	1.793	0.807	Attachment of cells	1.981	1.981
Apoptosis of fibroblasts	2.377	BCL2,CASP8,CASP9,CFLAR,FASLG,GLS,IFNAR1,IFNAR2,MYC,TNFSF10	Cell movement	-1.426	AXL,CD44,CDH1,CSF1R,DCC,DSG2,FGFR3,FGFR4,JAG2,LRP2,MET,MUC1,ROBO1,SDC1,TYRO3	Binding of extracellular matrix	1.951	APP,CD44,CDH1,DLL1,FGFR4	Neoplasia of cells	1.697	CD44,CDH1,EFNB2,MET,NRG1			Necrosis	2.186	1.657	Cellular infiltration by leukocytes	-0.017	-2.196
Apoptosis of lung cell lines	1.963	ALCAM,CD44,FCGR2A,ICAM1,IFNG,ITGB2,LIPG,SELPLG,THY1	Cell movement of tumor cell lines	-2.064	AXL,CD44,CDH1,CSF1R,DCC,DSG2,FGFR3,FGFR4,MET,MUC1,ROBO1,SDC1,TYRO3	Cell death of Schwann cells	-1.969	CD44,NRG1,NRG2,SDC3	Growth of embryo	1.706	APP,BTC,CD44,CX3CL1,DAG1,DLL1,FGFR3,LRP6,MET,NRG1,NRG2			Organization of cytoskeleton	1.854	0.424	Differentiation of nervous system	2.401	1.524
Binding of blood cells	1.664	ABCG2,ATM,ATR,BCL2,BCL2L11,BID,BLM,CASP4,CASP8,CASP9,CD40,CDKN2A,CFLAR,CHEK1,COMP,DICER1,FAS,FASLG,GLS,GNA13,GRB10,GSN,HSPD1,IFNAR1,IFNAR2,IFNG,IL10,IRF7,ITGA6,MAPK14,MYC,NBN,NFKB1,NGF,NSMCE4A,RHOG,SFRP1,TNF,TNFRSF10B,TNFRSF1A,TNFSF10	Cell proliferation of leukocyte cell lines	-2.2	APLP1,APLP2,APP,AXL,CD44,CDH1,CSF1R,CX3CL1,DAG1,DCC,DLL1,DNER,DSG2,EFNB2,FGFR3,FGFR4,IL6R,JAG2,KCNE4,LRP2,LRP6,MET,MUC1,MUSK,NRG1,NRG2,PAM,PKHD1,PTK7,ROBO1,SDC1,SDC2,SDC3,TIE1,TYRO3,VLDLR	Cell movement of tumor cell lines	2.166	APP,AXL,CD44,CDH1,CSF1R,CX3CL1,FGFR3,IL6R,JAG2,MET,MUC1,NRG1,ROBO1,SDC1,SDC2,SDC3,TGFBR3	Development of body trunk	1.714	AXL,BTC,CD44,CDH1,CSF1R,DLL1,DSG2,FGFR3,FGFR4,GHR,IL6R,LRP2,LRP6,MET,NRG1,PKHD1,PTK7,ROBO1,TGFBR3,TIE1,TYRO3						Growth of embryo	1.721	1.706
Cell death of connective tissue cells	2.567	ABCG2,ATM,ATR,BCL2,BCL2L11,BLM,CASP4,CASP8,CASP9,CD40,CFLAR,COMP,DICER1,FAS,FASLG,GLS,GNA13,GRB10,GSN,HSPD1,IFNAR1,IFNAR2,IRF7,ITGA6,MYC,NBN,NFKB1,NGF,NSMCE4A,RHOG,TNF,TNFRSF10B,TNFRSF1A,TNFSF10	Cell proliferation of squamous cell carcinoma cell lines	-1.723	CD44,CSF1R,FGFR3,GHR,IL6R,MET,NRG1,SDC2	Cellular infiltration by leukocytes	-0.017	APP,CD44,CSF1R,CX3CL1,CXCL16,IL6R,KCNE3,MET	Metastasis of tumor cell lines	1.753	AXL,CD44,CDH1,MET						Invasion of breast cancer cell lines	1.571	2.36
Cell death of fibroblast cell lines	1.936	BID,CDKN2A,CFLAR,CHEK1,FAS,FASLG,IFNG,IL10,MAPK14,SFRP1,TNF,TNFSF10	Cell proliferation of tumor cell lines	-2.794	APP,CD44,CDH1,CX3CL1,EFNB2,MET	Chemotaxis	1.96	APP,AXL,CD44,CSF1R,CX3CL1,CXCL16,EFNB2,IL6R,JAG2,LRP2,MET,MUC1,NRG1,ROBO1,RYK	Migration of breast cancer cell lines	1.767	APLP2,APP,AXL,CD44,CDH1,CSF1R,CXCL16,DCC,DNER,DSG2,EFNB2,FGFR3,FGFR4,GHR,IL6R,JAG2,KCNE4,LRP2,LRP6,MET,MUC1,NRG1,NRG2,PKHD1,PTK7,ROBO1,RYK,SDC1,SDC2,TGFBR3,TIE1,TYRO3						Invasion of carcinoma cell lines	0.774	2.167
Cell death of fibroblasts	2.156	ADIPOQ,ADRB2,ALCAM,CCL3,CHRM3,COL6A1,CXCL10,CXCL8,EFNA3,EFNA5,EGF,EPB41L4B,FGF1,GRB2,HBEGF,IFNG,IGF1,IL2RA,ITGA5,ITGAV,KRT16,MAP4K4,MMP9,MSR1,MYC,NOX4,PFN1,PLAU,PLAUR,PLPP3,PROX1,PTPRZ1,S1PR1,SH3PXD2A,SMARCB1,TGFB3,TGFBR1,TGM2,TIMP1,TNF,VEGFA			AXL,CD44,CDH1,MET,MUC1,NRG1	Development of carcinoma	1.732	APLP1,APLP2,APP,AXL,CD44,CDH1,CLSTN1,CSF1R,CX3CL1,DAG1,DCC,DLL1,DNER,DSG2,EFNB2,FGFR3,FGFR4,IL6R,JAG2,KCNE4,LRP2,LRP6,MET,MUC1,MUSK,NRG1,NRG2,PAM,PKHD1,PTK7,ROBO1,SDC1,SDC2,SDC3,TGFBR3,TIE1,TYRO3,VLDLR	Activation of cells	1.768	APP,AXL,CD44,CDH1,CSF1R,CX3CL1,DLL1,EFNB2,FGFR3,IL6R,LRP6,MET,NRG1,SDC2,TGFBR3,TYRO3						Metastasis of tumor cell lines	-0.267	1.753
Cell movement	2.002	ADIPOQ,ADRB2,CHRM3,EFNA3,EFNA5,EPB41L4B,HBEGF,IGF1,ITGA5,ITGAV,KRT16,MAP4K4,MMP9,MYC,PTPRZ1,S1PR1,SH3PXD2A,TGFB3,TGFBR1,TIMP1			APP,AXL,CD44,CDH1,CSF1R,CX3CL1,FGFR3,IL6R,MET,MUC1,NRG1,SDC1,SDC2,SDC3	Differentiation of nervous system	2.401	APP,DAG1,DLL1,DNER,FGFR3,IL6R,LRP6,MET,NRG1,RYK	Scattering of cells	1.801							Migration of breast cancer cell lines	2.175	1.767
Cell movement of dermal cells	1.704	ADIPOQ,ADRB2,CHRM3,EFNA3,EFNA5,EPB41L4B,HBEGF,IGF1,ITGA5,ITGAV,KRT16,MAP4K4,MMP9,MYC,PTPRZ1,S1PR1,SH3PXD2A,TGFBR1,TIMP1			APLP1,APLP2,APP,AXL,BTC,CSF1R,DAG1,DLL1,DNER,FGFR3,LRP2,LRP6,MET,NRG1,ROBO1,RYK,TYRO3,VLDLR	Differentiation of neurons	1.998	APP,DLL1,FGFR3,IL6R,LRP6,MET,NRG1,RYK	Neoplasia of tumor cell lines	1.812	AXL,CD44,CDH1,CSF1R,DCC,DSG2,FGFR3,FGFR4,MET,MUC1,ROBO1,SDC1,TGFBR3,TYRO3						Migration of squamous cell carcinoma cell lines	1.974	1.974
Cell movement of keratinocytes	2.013	AIMP1,CD44,CDKN2A,EGF,IGF1,IGFBP4,NRAS,PLAU,PLAUR,PRDX4,SOD2,TGFB1,TNF			APP,AXL,CD44,CDH1,CSF1R,CX3CL1,FGFR3,IL6R,JAG2,MET,MUC1,NRG1,ROBO1,SDC1,SDC2,SDC3	Endocytosis by eukaryotic cells	1.851	APLP2,APP,AXL,BTC,CD44,CSF1R,CX3CL1,MET,TYRO3	Advanced malignant tumor	1.826	AXL,CD44,CDH1,CSF1R,DCC,DSG2,FGFR3,FGFR4,JAG2,LRP2,MET,MUC1,ROBO1,SDC1,TGFBR3,TYRO3						Movement Disorders	-1.982	1.982
Cell proliferation of fibroblasts	1.863	ATM,ATP7A,ATR,CCND1,CDKN2A,CEBPD,CSF1,ERCC6,FGF1,HDAC1,MAPK1,NBN,PML,PRKCA,RB1,SRC,VCAM1,VCP			AXL,CD44,CDH1,FGFR3,FGFR4,JAG2,MET,MUC1,SDC1,TYRO3	Engulfment of cells	2.141	APLP2,APP,AXL,BTC,CD44,CSF1R,CX3CL1,DLL1,LRP2,MET,TYRO3	Secondary tumor	1.826							Proliferation of connective tissue cells	2.571	2.026
Cell survival	1.816	CD44,FCGR2A,ITGB2,MEGF10	Cell survival	-1.404	APLP1,APLP2,APP,AXL,BTC,CSF1R,DLL1,DNER,FGFR3,GHR,JAG2,LRP2,LRP6,MET,NECTIN1,NRG1,PTK7,ROBO1,RYK,TYRO3,VLDLR	Entry into S phase	1.966	APP,CDH1,IL6R,MET,NRG1	Proliferation of epithelial cells	1.97							Proliferation of epithelial cells	1.97	1.97
		ARHGAP24,CDC42,CHMP1B,FCGR1A,GSK3B,PHLDB2,PTEN,RASSF1,SPAST,STMN2,TBCB	Cell-cell contact	1.731	CD44,FGFR3,GHR,IL6R,NRG1,SDC2	Growth of embryo	1.721	APP,BTC,CD44,CX3CL1,DAG1,DLL1,FGFR3,LRP6,MET,NRG1,NRG2	Migration of squamous cell carcinoma cell lines	1.974	BTC,CD44,CDH1,CSF1R,DSG2,EFNB2,FGFR3,GHR,IL6R,MET,TYRO3						Scattering of cells	1.801	1.801
		ABCG2,APAF1,ATM,ATR,BCL2,BCL2L11,BID,BLM,CASP3,CASP4,CASP8,CASP9,CASR,CD40,CDKN2A,CFLAR,CHEK1,COMP,DICER1,DSG3,FAS,FASLG,GLS,GNA13,GRB10,GSN,HSPD1,IFNAR1,IFNAR2,IFNG,IL10,IL15,IRF7,ITGA6,MAPK14,MCL1,MYC,NBN,NFKB1,NGF,NSMCE4A,PTAFR,RHOG,SFRP1,TNF,TNFRSF10A,TNFRSF10B,TNFRSF1A,TNFSF10,VCAM1,XIAP	Chemotaxis	-0.656	APLP2,CD44,CX3CL1,SDC1	Inflammatory response	1.851	APP,AXL,CD44,CSF1R,CX3CL1,CXCL16,IL6R,KCNE3,MUC1,NRG1,SDC1,TYRO3	Quantity of cellular protrusions	1.98							Secondary tumor	0.204	1.826
		ARHGAP24,CDC42,CHMP1B,FCGR1A,FGFR2,GSK3B,IGF1,LCP1,PHLDB2,PTEN,RASSF1,SPAST,STMN2,TBCB	Development of carcinoma	-2.213	APP,CD44,CDH1,CX3CL1	Internalization by tumor cell lines	1.698	APLP2,AXL,BTC,CD44,MET	Attachment of cells	1.981	BTC,CD44,DAG1,DSG2,NRG1,SDC3
			Development of central nervous system	-2.111	APLP2,APP,AXL,CD44,CDH1,CSF1R,CXCL16,DCC,DNER,DSG2,EFNB2,FGFR3,FGFR4,GHR,IL6R,JAG2,KCNE4,LRP2,LRP6,MET,MUC1,NRG1,NRG2,PKHD1,PTK7,ROBO1,SDC1,SDC2,TIE1	Invasion of breast cancer cell lines	1.571	AXL,CD44,CDH1,MET,MUC1,NRG1,TGFBR3	Movement Disorders	1.982	APP,CDH1,CLSTN1,LRP2,MET,NRG1
			Development of head	-2	APLP2,APP,AXL,BTC,CD44,CSF1R,CX3CL1,DLL1,LRP2,MET,TYRO3	Invasion of carcinoma cell lines	0.774	APP,AXL,BTC,CD44,CDH1,MET,MUC1	Invasion of tumor cell lines	2.015	AXL,CD44,CDH1,FGFR3,FGFR4,MET,MUC1,SDC1,TGFBR3
Endocytosis	1.067		Endocytosis	-1.28	AXL,CD44,CDH1,FGFR3,FGFR4,MET,MUC1,SDC1	Mammary tumor	-1.98	APP,AXL,CD44,CDH1,CSF1R,CX3CL1,FGFR3,FGFR4,JAG2,LRP2,LRP6,MET,MUC1,NRG1,PKHD1,PLXDC2,ROBO1,SDC1,TGFBR3,TIE1,VLDLR	Proliferation of connective tissue cells	2.026
			Engulfment of cells	-1.853	APP,AXL,CD44,CDH1,CSF1R,CX3CL1,CXCL16,DLL1,FGFR3,IL6R,LRP2,LRP6,MUC1,NECTIN1,NRG1,SDC1	MAPKKK cascade	-1.982	BTC,CX3CL1,DAG1,FGFR3,FGFR4,MET,NRG1,NRG2,RYK	Invasion of carcinoma cell lines	2.167	APP,AXL,BTC,CD44,CDH1,FGFR4,MET,MUC1,NRG1,SDC1,SDC2,TGFBR3
			Enteritis	-1.698	APLP1,APLP2,APP,AXL,BTC,CSF1R,DLL1,DNER,FGFR3,LRP2,LRP6,MET,NRG1,ROBO1,RYK,TYRO3,VLDLR	Metastasis of tumor cell lines	-0.267	AXL,CD44,CDH1,FGFR3,FGFR4,MET,MUC1,SDC1,TGFBR3	Invasion of breast cancer cell lines	2.36	APP,AXL,BTC,CD44,CDH1,MET,MUC1
			Formation of brain	-1.732	AXL,CD44,CDH1,FGFR3,MET	Microtubule dynamics	1.678	APP,AXL,CD44,CDH1,CLSTN1,CSF1R,DAG1,DCC,DNER,EFNB2,GHR,LRP2,MET,MUSK,NECTIN1,NRG1,PKHD1,PTK7,ROBO1,RYK,SDC2,SDC3,VLDLR
			Growth of organism	-1.564	AXL,CD44,CDH1,CSF1R,CX3CL1,FGFR3,IL6R,MUC1	Migration of breast cancer cell lines	2.175	AXL,CD44,CDH1,MET,NRG1,SDC1,TGFBR3
			Growth of tumor	-2.268	APP,AXL,BTC,CD44,CDH1,MET,MUC1	Migration of melanoma cell lines	1.949	CD44,CDH1,NRG1,SDC1,SDC2
			Inflammation of absolute anatomical region	-1.642	APLP2,AXL,BTC,CD44,MET	Migration of squamous cell carcinoma cell lines	1.974	AXL,CD44,CDH1,MET
			Inflammation of organ	-1.806	APP,AXL,CD44,CDH1,CSF1R,CX3CL1,DLL1,FGFR3,IL6R,LRP6,MUC1,NECTIN1,NRG1,SDC1	Migration of tumor cell lines	1.939	APP,AXL,CD44,CDH1,CSF1R,CX3CL1,FGFR3,IL6R,MET,MUC1,NRG1,SDC1,SDC2,SDC3,TGFBR3
			Interaction of muscle cells	2	APP,AXL,BTC,CD44,CDH1,FGFR4,MET,MUC1,NRG1,ROBO1,SDC1,SDC2	Movement Disorders	-1.982	APLP1,APLP2,APP,CD44,CSF1R,CX3CL1,DCC,FGFR3,FGFR4,MUC1,MUSK,NRG1,VLDLR
			Internalization by tumor cell lines	-1.677	APP,AXL,BTC,CD44,CDH1,FGFR4,MET,MUC1,NRG1,SDC1,SDC2	Organization of cytoskeleton	2.095	APP,AXL,CD44,CDH1,CLSTN1,CSF1R,DAG1,DCC,DNER,EFNB2,GHR,LRP2,MET,MUSK,NECTIN1,NRG1,PAM,PKHD1,PTK7,ROBO1,RYK,SDC2,SDC3,VLDLR
			Invasion of carcinoma cell lines	-1.687	APLP1,APP,BTC,CD44,CX3CL1,DAG1,DLL1,EFNB2,FGFR3,FGFR4,GHR,LRP6,MET,NRG1,NRG2	Phosphorylation of protein	2.235	APP,CD44,CSF1R,CX3CL1,EFNB2,FGFR3,FGFR4,GHR,LRP6,MET,MUSK,NRG1,TYRO3
			Invasion of cells	-1.608	APLP2,APP,AXL,BTC,CD44,CDH1,CSF1R,CX3CL1,CXCL16,DAG1,DCC,DSG2,EFNB2,FGFR3,FGFR4,IL6R,KCNE3,LRP6,MET,MUC1,NRG1,ROBO1,SDC1,SDC2,SDC3,TIE1,TYRO3,VLDLR	Proliferation of connective tissue cells	2.571	BTC,CD44,CDH1,CSF1R,DSG2,EFNB2,FGFR3,GHR,IL6R,MET,TYRO3			AXL,CD44,CDH1,MET,MUC1,NRG1,TGFBR3
			Invasion of tumor cell lines	-1.596	APLP2,APP,AXL,BTC,CD44,CDH1,CSF1R,CX3CL1,CXCL16,DAG1,DCC,DLL1,DSG2,EFNB2,FGFR3,FGFR4,IL6R,JAG2,KCNE3,LRP2,LRP6,MET,MUC1,NRG1,ROBO1,RYK,SDC1,SDC2,SDC3,TIE1,TYRO3,VLDLR	Proliferation of endothelial cells	-1.821	APP,AXL,CD44,CSF1R,EFNB2,FGFR3,NRG2,VLDLR			AXL,CD44,CDH1,MET,NRG1,SDC1,TGFBR3
			Metastasis of tumor cell lines	-1.836	APP,AXL,BTC,CD44,CDH1,CSF1R,CX3CL1,DCC,EFNB2,FGFR3,GHR,IL6R,JAG2,MET,MUSK,NRG1,SDC1,TIE1,TYRO3	Proliferation of epithelial cells	1.97	BTC,CD44,CDH1,DCC,EFNB2,FGFR3,IL6R,LRP6,MET,TGFBR3			APLP1,APLP2,APP,CD44,CSF1R,CX3CL1,DCC,FGFR3,FGFR4,MUC1,MUSK,NRG1,VLDLR
Microtubule dynamics	1.793		Microtubule dynamics	0.807	APLP1,APLP2,APP,AXL,BTC,CD44,CDH1,CSF1R,CX3CL1,DLL1,LRP2,MET,TYRO3,VLDLR	Proliferation of neuroglia	2.166	CSF1R,CXCL16,DNER,IL6R,LRP2,NRG1,SDC3			AXL,CD44,CDH1,FGFR3,FGFR4,JAG2,MET,MUC1,SDC1,TGFBR3,TYRO3
			Migration of carcinoma cell lines	-2.118	APP,AXL,CD44,CSF1R,CX3CL1,CXCL16,EFNB2,IL6R,JAG2,LRP2,MET,MUC1,NRG1,ROBO1,RYK	Proliferation of tumor cells	1.433	BTC,CD44,CDH1,CSF1R,DCC,FGFR3,FGFR4,IL6R,MET,MUC1,NRG1,SDC2			BTC,CD44,CDH1,DCC,EFNB2,FGFR3,IL6R,LRP6,MET,TGFBR3
			Migration of cells	-1.514	APP,AXL,CD44,CDH1,CSF1R,DAG1,DCC,DNER,EFNB2,GHR,LRP2,MET,MUSK,NECTIN1,NRG1,PAM,PKHD1,PTK7,ROBO1,RYK,SDC2,SDC3,VLDLR	Protein kinase cascade	-1.432	APP,BTC,CX3CL1,DAG1,FGFR3,FGFR4,GHR,MET,NRG1,NRG2,RYK
			Migration of tumor cell lines	-2.118	APP,AXL,CD44,CDH1,CSF1R,DAG1,DCC,DNER,EFNB2,GHR,LRP2,MET,MUSK,NECTIN1,NRG1,PKHD1,PTK7,ROBO1,RYK,SDC2,SDC3,VLDLR	Quantity of cellular protrusions	1.98	APP,CDH1,CLSTN1,LRP2,MET,NRG1
Necrosis	2.186		Necrosis	1.657	APP,AXL,BTC,CD44,CDH1,CSF1R,CX3CL1,DAG1,DCC,DLL1,DSG2,EFNB2,FGFR3,FGFR4,GHR,IL6R,LRP6,MET,MUC1,MUSK,NRG1,SDC1,SDC2,TYRO3	Scattering of cells	1.801	CD44,CDH1,EFNB2,MET,NRG1
			Neoplasia of cells	-2.395	APLP1,APLP2,APP,AXL,BTC,CD44,CDH1,CSF1R,CX3CL1,CXCL16,DCC,DLL1,EFNB2,FGFR3,GHR,IL6R,JAG2,LRP6,MET,MUC1,MUSK,NRG1,NRG2,SDC1,SDC3,TYRO3,VLDLR	Secondary tumor	0.204	AXL,CD44,CDH1,CSF1R,DCC,DSG2,FGFR3,FGFR4,MET,MUC1,ROBO1,SDC1,TGFBR3,TYRO3
			Neoplasia of tumor cell lines	-2.049	APLP2,APP,CD44,CDH1,CSF1R,CX3CL1,CXCL16,DAG1,DCC,DSG2,EFNB2,LRP6,MET,MUSK,NECTIN1,NRG1,NRG2,PKHD1,SDC2	Synthesis of DNA	1.72	APP,BTC,CSF1R,FGFR4,MET,NRG1,NRG2,TGFBR3
			Organismal death	2.355	APLP1,APLP2,CD44,DCC,FGFR3,GHR,JAG2,LRP2,LRP6,MET,MUSK,ROBO1,TIE1	Transmigration of tumor cell lines	1.948	APP,CD44,CDH1,CX3CL1
Organization of cytoskeleton	1.854		Organization of cytoskeleton	0.424	APLP2,APP,CDH1,MET,NRG1	Tyrosine phosphorylation of protein	1.708	APP,CD44,CSF1R,CX3CL1,EFNB2,GHR,MET,NRG1
			Perinatal death	1.781	APP,AXL,BTC,CD44,CDH1,CSF1R,CX3CL1,DAG1,DCC,DLL1,DSG2,EFNB2,FGFR3,FGFR4,GHR,IL6R,JAG2,LRP2,LRP6,MET,MUC1,MUSK,NRG1,NRG2,PKHD1,SDC1,SDC2,TYRO3
			Proliferation of B-lymphocyte derived cell lines	-1.964	APP,CX3CL1,CXCL16,NRG1
			Quantity of cells	1.685	APLP1,APLP2,APP,AXL,BTC,CD44,CDH1,CSF1R,DAG1,DCC,DLL1,DSG2,EFNB2,FGFR3,FGFR4,GHR,IL6R,JAG2,LRP2,LRP6,MET,MUC1,MUSK,NECTIN1,NRG2,PAM,ROBO1,RYK,SDC1,TIE1,VLDLR
			Quantity of intercellular junctions	1.952
			Secondary tumor	-2.266
			Size of body	-2.421
			Transmigration of cells	-2.148
			Transmigration of tumor cell lines	-1.948
